# Supplementary material for: Withaferin A and Ovarian Cancer Antagonistically Regulate Skeletal Muscle Mass
Source: Front Cell Dev Biol. 2021 Feb 25;9:636498. doi: 10.3389/fcell.2021.636498 (PMC7947350; doi:10.3389/fcell.2021.636498)
Supplement: Supplementary file 3 [file Data_Sheet_1.xlsx]

## Sheet: 1A - Forelimb GS - Week 4
ANOVA table	SS	DF	MS	F (DFn, DFd)	P value
Interaction	0.0002495	2	0.0001248	F (2, 54) = 21.02	P<0.0001
Row Factor	0.0007682	1	0.0007682	F (1, 54) = 129.4	P<0.0001
Column Factor	0.001119	2	0.0005595	F (2, 54) = 94.26	P<0.0001
Residual	0.0003205	54	5.935e-06

## Sheet: 1B - Total GS - Week 4
ANOVA table	SS	DF	MS	F (DFn, DFd)	P value
Interaction	0.0006221	2	0.000311	F (2, 54) = 24.40	P<0.0001
Row Factor	0.001888	1	0.001888	F (1, 54) = 148.1	P<0.0001
Column Factor	0.002145	2	0.001073	F (2, 54) = 84.14	P<0.0001
Residual	0.0006884	54	1.275e-05

## Sheet: 1C - Cross-sectional Area
ANOVA table	SS	DF	MS	F (DFn, DFd)	P value
Interaction	412751	2	206375	F (2, 54) = 35.09	P<0.0001
Row Factor	1662325	1	1662325	F (1, 54) = 282.6	P<0.0001
Column Factor	2436164	2	1218082	F (2, 54) = 207.1	P<0.0001
Residual	317588	54	5881

## Sheet: 1D - Minimal Feret's Diameter
ANOVA table	SS	DF	MS	F (DFn, DFd)	P value
Interaction	60.57	2	30.28	F (2, 54) = 28.12	P<0.0001
Tumor	301.9	1	301.9	F (1, 54) = 280.3	P<0.0001
Treatment	317.8	2	158.9	F (2, 54) = 147.5	P<0.0001
Residual	58.16	54	1.077

## Sheet: 2B - Satellite Cell Quant
ANOVA table	SS	DF	MS	F (DFn, DFd)	P value
Interaction	0.3956	2	0.1978	F (2, 54) = 1742	P<0.0001
Tumor Status	0.03702	1	0.03702	F (1, 54) = 326.0	P<0.0001
Treatment	0.2791	2	0.1395	F (2, 54) = 1229	P<0.0001
Residual	0.006132	54	0.0001135

## Sheet: 2D - Pax7+ MyoD-
ANOVA table	SS	DF	MS	F (DFn, DFd)	P value
Interaction	2352	2	1176	F (2, 54) = 391.3	P<0.0001
Tumor Status	30.28	1	30.28	F (1, 54) = 10.07	P=0.0025
Treatment	26022	2	13011	F (2, 54) = 4329	P<0.0001
Residual	162.3	54	3.006

## Sheet: 2E - Pax7+ MyoD+
ANOVA table	SS	DF	MS	F (DFn, DFd)	P value
Interaction	2352	2	1176	F (2, 54) = 391.3	P<0.0001
Tumor Status	30.28	1	30.28	F (1, 54) = 10.07	P=0.0025
Treatment	26022	2	13011	F (2, 54) = 4329	P<0.0001
Residual	162.3	54	3.006

## Sheet: 2F - Pax7 qPCR
ANOVA table	SS	DF	MS	F (DFn, DFd)	P value
Interaction	367.3	2	183.6	F (2, 54) = 84.20	P<0.0001
Tumor Status	68.07	1	68.07	F (1, 54) = 31.21	P<0.0001
Treatment	804.1	2	402	F (2, 54) = 184.3	P<0.0001
Residual	117.8	54	2.181

## Sheet: 2F - MyoD qPCR
ANOVA table	SS	DF	MS	F (DFn, DFd)	P value
Interaction	5.457	2	2.729	F (2, 54) = 13.32	P<0.0001
Tumor Status	32.69	1	32.69	F (1, 54) = 159.6	P<0.0001
Treatment	107.7	2	53.84	F (2, 54) = 262.9	P<0.0001
Residual	11.06	54	0.2048

## Sheet: 3A - Eif2ak3 qPCR
ANOVA table	SS	DF	MS	F (DFn, DFd)	P value
Interaction	5.512	2	2.756	F (2, 54) = 25.04	P<0.0001
Tumor Status	5.421	1	5.421	F (1, 54) = 49.25	P<0.0001
Treatment	4.031	2	2.016	F (2, 54) = 18.31	P<0.0001
Residual	5.944	54	0.1101

[truncated: 14 more sheets: 3A - Atf4 qPCR, 3A - Ddit3 qPCR, 3A - Ppp1r15a qPCR, 3A - Hspa5 qPCR, 3A - Hsp90B1 qPCR, 3A - Ern1 qPCR, 3A - Tnfrsf10B qPCR, 4A - Fbxo30 qPCR, 4A - Fbxo32 qPCR, 4A - Trim63 qPCR, 4A - Traf6 qPCR, 4C - Sqstm1 qPCR, 4C - Map1lc3b qPCR, 4C - Becn1 qPCR]
